# Supplementary material for: Influence of Physicochemical Characteristics and Stability of Gold and Silver Nanoparticles on Biological Effects and Translocation across an Intestinal Barrier—A Case Study from In Vitro to In Silico
Source: MDPI journal article supplement (doi:10.3390/nano11061358), 2021-05-21
Supplement: s1 [file s1]

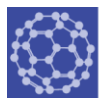

## Article

# Influence of Physicochemical Characteristics and Stability of Gold and Silver Nanoparticles on Biological Effects and Translocation Across An Intestinal Barrier-A Case Study from in Vitro to in Silico

Yvonne Kohl <sup>1,\*</sup>, Michelle Hesler <sup>1</sup>, Roland Drexel <sup>2</sup>, Lukas Kovar <sup>3</sup>, Stephan Dähnhardt-Pfeiffer <sup>4</sup>, Dominik Selzer <sup>3</sup>, Sylvia Wagner <sup>1</sup>, Thorsten Lehr <sup>3</sup>, Hagen von Briesen <sup>1</sup> and Florian Meier <sup>2,\*</sup>

- <sup>1</sup> Fraunhofer Institute for Biomedical Engineering IBMT, Sulzbach, 66280, Germany; yvonne.kohl@ibmt.fraunhofer.de (Y.K.); michelle.hesler@ibmt.fraunhofer.de (M.H.); sylvia.wagner@ibmt.fraunhofer.de (S.W.); hagen.briesen@ibmt.fraunhofer.de (H.v.B.)
- <sup>2</sup> Postnova Analytics GmbH, Landsberg am Lech, 86899, Germany; roland.drexel@postnova.com (R.D.); florian.meier@postnova.com (F.M.)
- <sup>3</sup> Department of Clinical Pharmacy, Saarland University, Saarbrücken, 66123, Germany; lukas.kovar@uni-saarland.de (L.K.); dominik.selzer@uni-saarland.de (D.S.); thorsten.lehr@uni-saarland.de (T.L.)
- <sup>4</sup> Microscopy Services Dähnhardt GmbH, Flintbek, 24220, Germany; sd@msd.sh (S.D.-P.)
- \* Correspondence: yvonne.kohl@ibmt.fraunhofer.de (Y.K.); florian.meier@postnova.com (F.M.); Tel.: +49-6897-9071-256 (Y.K.); +49-8191-985-6880 (F.M.)

Citation: Kohl, Y.; Hesler, M.; Drexel, R.; Kovar, L.; Dähnhardt-Pfeiffer, S.; Selzer, D.; Wagner, S.; Lehr, T.; von Briesen, H.; Meier, F. Influence of Physicochemical Characteristics and Stability of Gold and Silver Nanoparticles on Biological Effects and Translocation Across An Intestinal Barrier-A Case Study from in Vitro to in Silico. *Nanomaterials* **2021**, *11*, 1358. <https://doi.org/10.3390/nano11061358>

Academic Editor: Ivana Vinkovic Vrcek

Received: 21 April 2021  
Accepted: 13 May 2021  
Published: 21 May 2021

**Publisher's Note:** MDPI stays neutral with regard to jurisdictional claims in published maps and institutional affiliations.

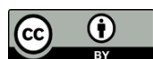

**Copyright:** © 2021 by the authors. Submitted for possible open access publication under the terms and conditions of the Creative Commons Attribution (CC BY) license (<https://creativecommons.org/licenses/by/4.0/>).

**Table S1.** EAF4 fractionation conditions for the different studied metallic nanoparticles (mNP).

| <b>AuNP-30</b>  | <b>Duration (min)</b> | <b>Cross flow rate<br/>(mL/min)</b> | <b>Cross flow decay type</b> |
|-----------------|-----------------------|-------------------------------------|------------------------------|
| Elution step 1  | 5                     | 1.00                                | Constant                     |
| Elution step 2  | 25                    | 1.00                                | Linear                       |
| Elution step 3  | 3                     | 0.25                                | Power, exp. 0.80             |
| Elution step 4  | 7                     | 0.18                                | Power, exp. 0.70             |
| Elution step 5  | 5                     | 0.10                                | Constant                     |
| Rinse step      | 10                    | 0                                   | -                            |
| <b>AuNP-200</b> | <b>Duration (min)</b> | <b>Cross flow rate<br/>(mL/min)</b> | <b>Cross flow decay type</b> |
| Elution step 1  | 5                     | 0.80                                | Constant                     |
| Elution step 2  | 20                    | 0.80                                | Power, exp. 0.10             |
| Elution step 3  | 10                    | 0.03                                | Constant                     |
| Rinse step      | 10                    | 0                                   | -                            |
| <b>AuNRods</b>  | <b>Duration (min)</b> | <b>Cross flow rate<br/>(mL/min)</b> | <b>Cross flow decay type</b> |
| Elution step 1  | 5                     | 1.00                                | Constant                     |
| Elution step 2  | 25                    | 1.00                                | Power, exp. 0.20             |
| Elution step 3  | 10                    | 0.10                                | Constant                     |
| Rinse step      | 10                    | 0                                   | -                            |
| <b>AgNP</b>     | <b>Duration (min)</b> | <b>Cross flow rate<br/>(mL/min)</b> | <b>Cross flow decay type</b> |
| Elution step 1  | 20                    | 1.20                                | Constant                     |
| Elution step 2  | 15                    | 1.20                                | Linear                       |
| Elution step 3  | 3                     | 0.28                                | Power, exp. 0.80             |
| Elution step 4  | 7                     | 0.18                                | Power, exp. 0.70             |
| Elution step 5  | 5                     | 0.1                                 | Constant                     |
| Rinse step      | 10                    | 0                                   | -                            |

**Table S2.** Parameter estimates of gold nanoparticle translocation non-linear mixed effect modeling.

| <b>Parameters</b>    | <b>Estimate (% RSE)</b>   | <b>Parameter description</b>                                                   |
|----------------------|---------------------------|--------------------------------------------------------------------------------|
| $k_{12}$             | $5.5 \times 10^{-3}$ (35) | Transfer constant from apical to cellular compartment                          |
| $k_{21}$             | $2.4 \times 10^{-2}$ (35) | Transfer constant from cellular to apical compartment                          |
| $k_{23}$             | $7.6 \times 10^1$ (6)     | Transfer constant from cellular to basolateral compartment                     |
| $k_{32}$             | $1.0 \times 10^2$ (49)    | Transfer constant from basolateral to cellular compartment                     |
| $\varphi$            | $6.9 \times 10^{-1}$ (4)  | Fraction available for translocation through the cell layers (population mean) |
| $\omega_{\varphi}^2$ | $6.9 \times 10^{-3}$ (93) | Between-particle-species variability on $\varphi$                              |
| $\sigma_1^2$         | $1.5 \times 10^{-1}$ (48) | Variance of proportional residual error                                        |
| $\sigma_2^2$         | 4.5 (36)                  | Variance of additive residual error                                            |

RSE: relative standard error; unit of transfer constants is in %/min

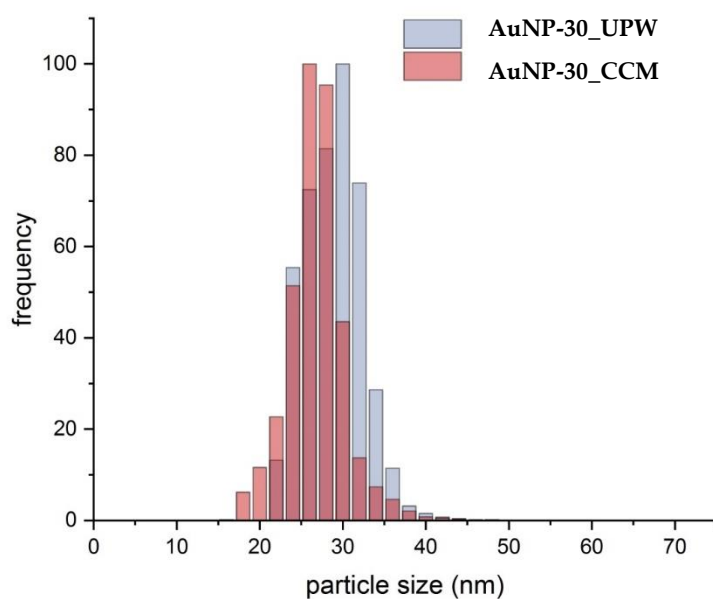

**Figure S1.** Comparison of the native size distribution of AuNP-30 with the size distribution in CCM obtained by spICP-MS. UPW = ultrapure water, CCM = cell culture medium.

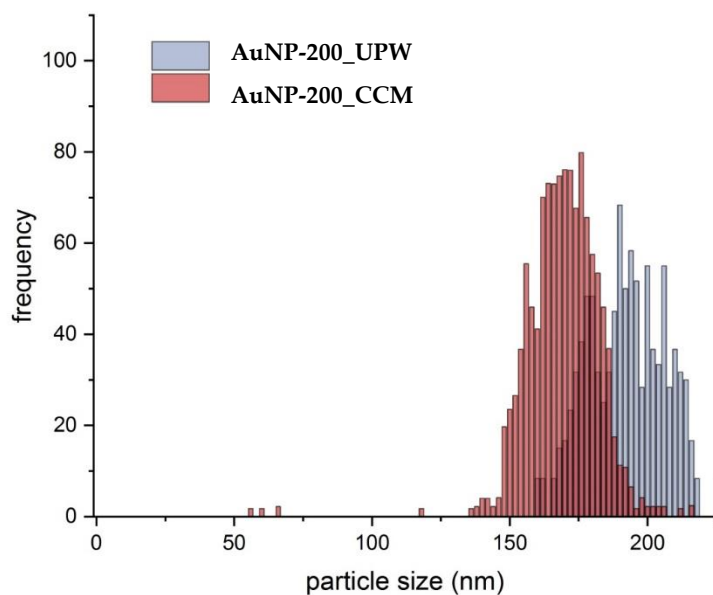

**Figure S2.** Comparison of the native size distribution of AuNP-200 with the size distribution in CCM obtained by spICP-MS. UPW = ultrapure water, CCM = cell culture medium.

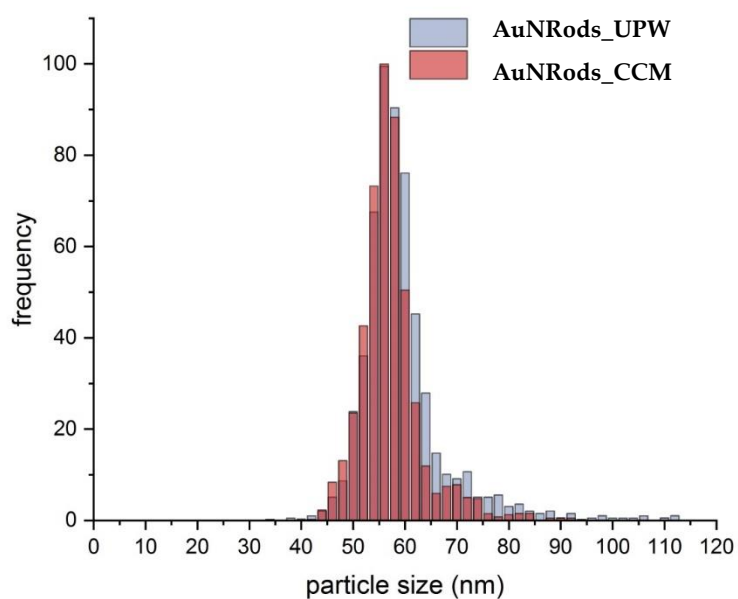

**Figure S3.** Comparison of the native size distribution of AuNRods with the size distribution in CCM obtained by spICP-MS. UPW = ultrapure water, CCM = cell culture medium.

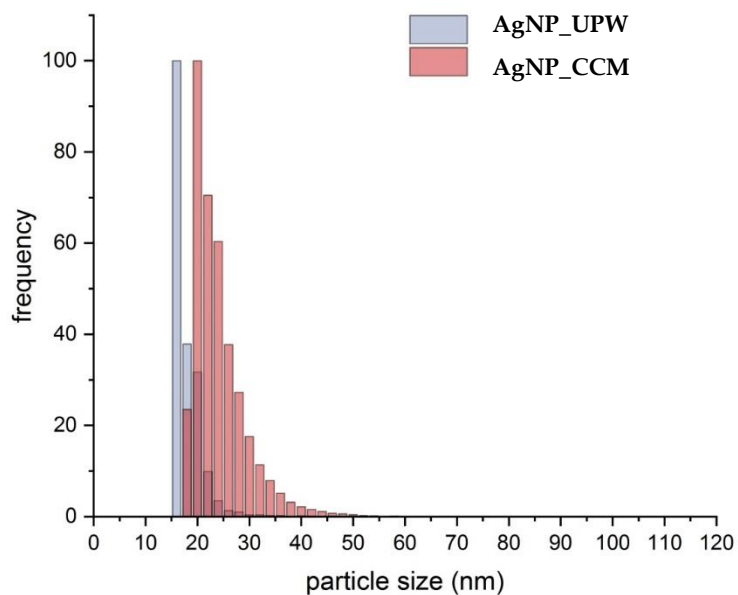

**Figure S4.** Comparison of the native size distribution of AgNP with the size distribution in CCM obtained by spICP-MS. UPW = ultrapure water, CCM = cell culture medium.

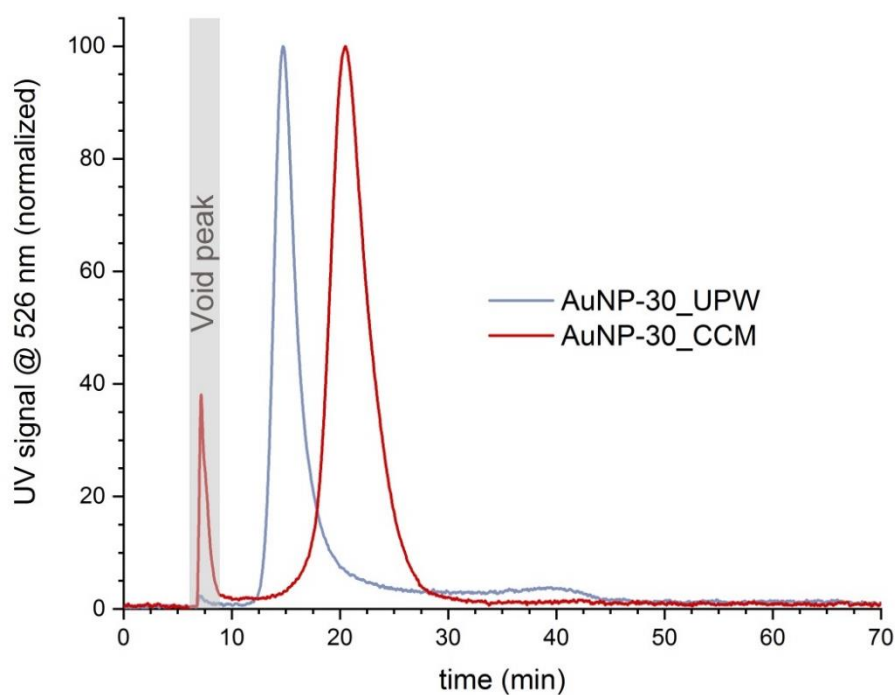

**Figure S5.** Fractogram with the UV/Vis signals of AuNP-30 comparing the sample in UPW and CCM. The size retention time was shifted to larger times, indicating an increased hydrodynamic size. UPW = ultrapure water, CCM = cell culture medium.

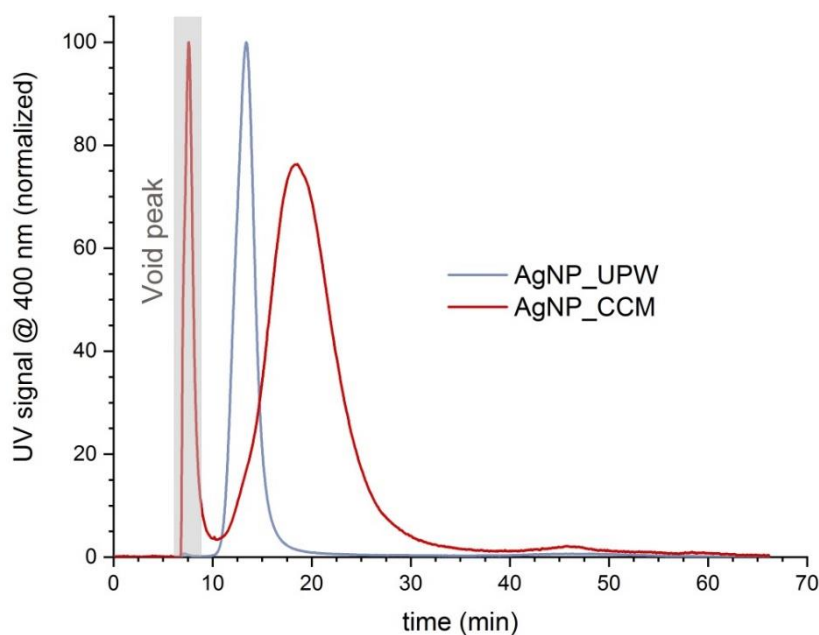

**Figure S6.** Fractogram with UV/Vis signals of AgNP comparing the sample in UPW and CCM. The retention time was shifted to larger times, indicating an increased hydrodynamic size, which came along with a significant broadening of the signal. The second observation suggests agglomeration. UPW = ultrapure water, CCM = cell culture medium.

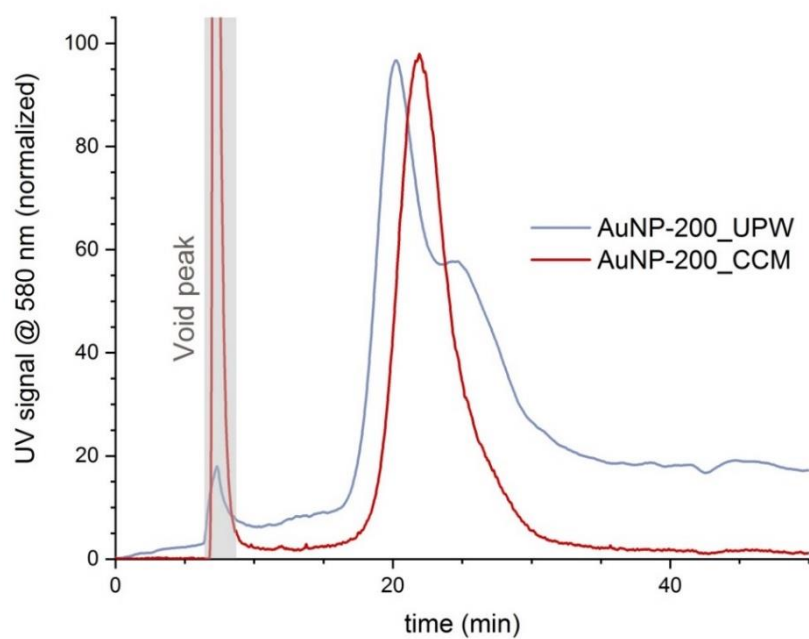

**Figure S7.** Fractogram with the UV/Vis signals of AuNP-200 comparing the sample in UPW and CCM. UPW = ultrapure water, CCM = cell culture medium.

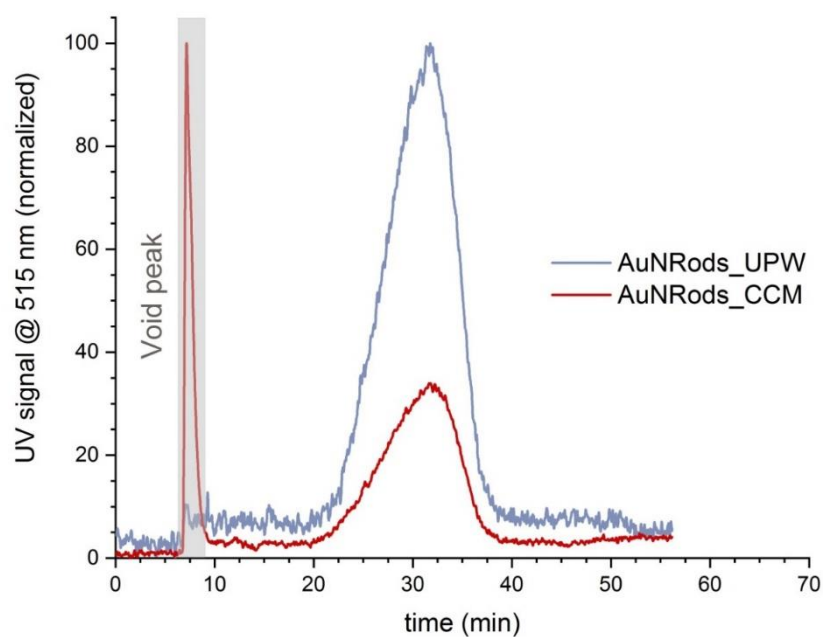

**Figure S8.** Fractogram with the UV/Vis signals of AuNRods comparing the sample in UPW and CCM. UPW = ultrapure water, CCM = cell culture medium.
